# Supplementary material for: Between security and convenience: Facial recognition technology in the eyes of citizens in China, Germany, the United Kingdom, and the United States
Source: PubMed Central journal article supplement (PMC8314996; doi:10.1177/09636625211001555), 2021-03-26

# Supplemental material

## Between security and convenience: Facial recognition technology in the eyes of citizens in China, Germany, the UK and the US

Genia Kostka<sup>a\*</sup>, Léa Steinacker<sup>b</sup>, and Miriam Meckel<sup>c</sup>

<sup>a</sup>*Institute of Chinese Studies, Freie University of Berlin, Berlin, Germany;* <sup>b</sup>*University of St.Gallen, St.Gallen, Switzerland* , <sup>c</sup>*Institute for Media and Communications Management, University of St.Gallen, St.Gallen, Switzerland*

\*Corresponding author: [genia.kostka@fu-berlin.de](mailto:genia.kostka@fu-berlin.de)

### Table of Content

Table S1: Summary dependent variable and independent variable

Table S2: Summary statistics by country

Table S3: Model test results

Table S4: Ordered logistic regressions: acceptance of general use of FRT

Table S5: Ordered logistic regressions: acceptance of public use of FRT

Table S6: Ordered logistic regressions: acceptance of private use of FRT

Figure S1: Social acceptance and socio-demographic factors

Figure S2: Use occasions by country

Figure S3: FRT providers - country distribution

Figure S4: Experience - Private use

\*\*\*\*\*

**Table S1: Summary Dependent Variable and Independent Variable**

| <b>In general, do you accept or oppose the use of facial recognition technology? (weighted, in %)</b> |                           |                        |                        |                                  |                        |                        |          |
|-------------------------------------------------------------------------------------------------------|---------------------------|------------------------|------------------------|----------------------------------|------------------------|------------------------|----------|
|                                                                                                       | <b>Measurement</b>        | <i>Strongly oppose</i> | <i>Somewhat oppose</i> | <i>Neither oppose nor accept</i> | <i>Somewhat accept</i> | <i>Strongly accept</i> | <i>N</i> |
| <b>Dependent variable: Acceptance</b>                                                                 |                           |                        |                        |                                  |                        |                        |          |
|                                                                                                       |                           | 7.6                    | 13.7                   | 27.7                             | 36.6                   | 14.3                   | 6099     |
| <b>Independent variables Sociodemographic</b>                                                         |                           |                        |                        |                                  |                        |                        |          |
| <b>Age</b>                                                                                            | 18-35                     | 6.3                    | 12.1                   | 29.2                             | 37.8                   | 14.5                   | 2788     |
|                                                                                                       | 36-50                     | 9.1                    | 14.1                   | 26.3                             | 36.3                   | 14.2                   | 2032     |
|                                                                                                       | 51-65                     | 8.3                    | 16.6                   | 26.8                             | 34.2                   | 14.1                   | 1279     |
| <b>Gender</b>                                                                                         | Male                      | 7.5                    | 14.4                   | 24.7                             | 37.5                   | 15.9                   | 3144     |
|                                                                                                       | Female                    | 7.8                    | 13                     | 31                               | 35.5                   | 12.6                   | 2955     |
| <b>Income</b>                                                                                         | Low                       | 8.3                    | 13.9                   | 33.8                             | 31.0                   | 13.0                   | 798      |
|                                                                                                       | Medium                    | 6.1                    | 16.1                   | 27.8                             | 36.0                   | 13.9                   | 2227     |
|                                                                                                       | High                      | 9.7                    | 10.8                   | 22.3                             | 40.2                   | 17.1                   | 2318     |
|                                                                                                       | Prefer not to say         | 5.2                    | 15.4                   | 37.8                             | 33.1                   | 8.4                    | 756      |
| <b>Education</b>                                                                                      | Low                       | 26.3                   | 10.2                   | 22.9                             | 27.2                   | 13.4                   | 420      |
|                                                                                                       | Medium                    | 5.7                    | 14.5                   | 30.5                             | 36.2                   | 13.2                   | 3987     |
|                                                                                                       | High                      | 7.5                    | 12.8                   | 22.5                             | 39.8                   | 17.3                   | 1692     |
| <b>Ethnic Group</b>                                                                                   | Minority                  | 8                      | 17.1                   | 29                               | 30.8                   | 15.2                   | 866      |
|                                                                                                       | Majority                  | 7.6                    | 13                     | 24.6                             | 39.6                   | 15.1                   | 4314     |
|                                                                                                       | Don't know                | 7.5                    | 13.9                   | 41.3                             | 27.6                   | 9.8                    | 920      |
| <b>Living area</b>                                                                                    | Rural                     | 6.1                    | 13.6                   | 30.6                             | 36.7                   | 13                     | 2135     |
|                                                                                                       | City                      | 8.5                    | 13.8                   | 26.2                             | 36.5                   | 15                     | 3964     |
| <b>Exposure to FRT</b>                                                                                | 0 (None of the instances) | 12.2                   | 16.4                   | 35.4                             | 25.4                   | 10.5                   | 744      |
|                                                                                                       | 1                         | 7.8                    | 13.6                   | 31.7                             | 34.0                   | 12.8                   | 1719     |
|                                                                                                       | 2                         | 4.9                    | 15.0                   | 28.9                             | 39.0                   | 12.3                   | 992      |
|                                                                                                       | 3                         | 12.4                   | 11.9                   | 23.4                             | 38.3                   | 14.0                   | 972      |
|                                                                                                       | 4                         | 3.6                    | 12.9                   | 24.2                             | 42.5                   | 16.7                   | 632      |
|                                                                                                       | 5                         | 4.6                    | 15.1                   | 20.3                             | 40.6                   | 19.3                   | 467      |
|                                                                                                       | 6                         | 2.6                    | 12.8                   | 23.2                             | 40.0                   | 21.4                   | 233      |
|                                                                                                       | 7                         | 5.5                    | 10.8                   | 21.6                             | 45.4                   | 16.7                   | 154      |
|                                                                                                       | 8                         | 4.4                    | 10.1                   | 16.8                             | 46.1                   | 22.7                   | 62       |
|                                                                                                       | 9                         | 5.2                    | 10.8                   | 20.1                             | 39.4                   | 24.5                   | 61       |
|                                                                                                       | 10                        | 8.7                    | 5.2                    | 15.5                             | 44.1                   | 26.5                   | 38       |
|                                                                                                       | 11                        | 13.7                   | 7.5                    | 22.1                             | 27.2                   | 29.6                   | 26       |
| <b>Frequency of FRT Private Use</b>                                                                   | Never                     | 8.7                    | 18.5                   | 33.7                             | 30.3                   | 8.7                    | 2584     |
|                                                                                                       | Several times in my life  | 2.7                    | 14.1                   | 36.2                             | 37.8                   | 9.2                    | 427      |
|                                                                                                       | Several times a year      | 2.0                    | 13.2                   | 28.5                             | 46.6                   | 9.8                    | 333      |
|                                                                                                       | Several times a month     | 2.4                    | 10.3                   | 32.0                             | 42.0                   | 13.3                   | 383      |
|                                                                                                       | Several times a week      | 2.6                    | 13.0                   | 24.5                             | 45.6                   | 14.4                   | 431      |
|                                                                                                       | Most of the time          | 3.6                    | 12.1                   | 21.4                             | 43.5                   | 19.4                   | 559      |
|                                                                                                       | Everyday                  | 13.2                   | 6.6                    | 16.2                             | 38.3                   | 25.7                   | 1383     |
| <b>Frequency of FRT Public Use</b>                                                                    | Never                     | 7.7                    | 12.2                   | 36.6                             | 30.5                   | 12.9                   | 1383     |
|                                                                                                       | Several times in my life  | 4.0                    | 17.5                   | 31.5                             | 38.1                   | 8.8                    | 910      |
|                                                                                                       | Several times a year      | 3.0                    | 14.2                   | 27.5                             | 43.2                   | 12.2                   | 707      |
|                                                                                                       | Several times a month     | 3.0                    | 13.4                   | 27.6                             | 41.0                   | 15.0                   | 652      |
|                                                                                                       | Several times a week      | 5.5                    | 15.7                   | 21.4                             | 42.6                   | 14.8                   | 712      |

|                                         |                                              |      |      |      |      |      |      |
|-----------------------------------------|----------------------------------------------|------|------|------|------|------|------|
|                                         | Most of the time                             | 6.7  | 13.3 | 22.6 | 38.0 | 19.4 | 871  |
|                                         | Everyday                                     | 21.4 | 10.7 | 20.3 | 29.4 | 18.2 | 864  |
| <b>Perceived functions and accuracy</b> |                                              |      |      |      |      |      |      |
| <b>Conse-<br/>quences</b>               | Convenience                                  | 6    | 6.1  | 20.8 | 45.2 | 21.9 | 2200 |
|                                         | Privacy violations                           | 12.4 | 22   | 30   | 28.6 | 6.9  | 2526 |
|                                         | Efficiency                                   | 4.7  | 6.7  | 19.3 | 45.9 | 23.4 | 2089 |
|                                         | Discrimination                               | 21.1 | 25   | 24.7 | 21.5 | 7.8  | 780  |
|                                         | Security                                     | 2.8  | 9.5  | 25.8 | 44   | 18.3 | 3785 |
|                                         | Surveillance                                 | 6.4  | 16.6 | 28.5 | 36.4 | 12.1 | 3054 |
|                                         | None of the above                            | 12.1 | 11.3 | 42.2 | 19.6 | 14.8 | 265  |
| <b>Usefulness</b>                       | Smartphone usages                            | 6.7  | 11.1 | 26   | 38.8 | 17.3 | 2311 |
|                                         | Smart devices & gadgets                      | 7.4  | 13.2 | 26.6 | 37.6 | 15.2 | 1894 |
|                                         | Public streets                               | 11.6 | 12   | 26   | 37.1 | 13.3 | 981  |
|                                         | Railway, subway stations                     | 6    | 13   | 27.7 | 38.2 | 15.1 | 2173 |
|                                         | Customs control or security check at airport | 4.3  | 13.5 | 29   | 39.5 | 13.8 | 4012 |
|                                         | Tourist attractions                          | 9.2  | 13.2 | 29.4 | 34   | 14.2 | 648  |
|                                         | Identity verification for financial matters  | 3.6  | 13.8 | 27.9 | 40.3 | 14.4 | 2532 |
|                                         | Shopping malls or private shops              | 5    | 11.4 | 26.1 | 39.6 | 17.8 | 831  |
|                                         | Schools or universities                      | 5.6  | 13   | 30.4 | 36.6 | 14.5 | 1130 |
|                                         | Private household                            | 6.8  | 19.2 | 28.2 | 31.6 | 14.2 | 567  |
|                                         | None of the above                            | 32.1 | 22.8 | 27   | 11.4 | 6.2  | 406  |
| <b>Reliability</b>                      | Less reliable                                | 20.5 | 23.5 | 23.8 | 27   | 5.2  | 898  |
|                                         | Neither less nor more reliable               | 4.2  | 14.9 | 36.5 | 35.3 | 9.1  | 2344 |
|                                         | More reliable                                | 5.2  | 7.5  | 17.6 | 44.4 | 25.3 | 2186 |
|                                         | Don't know                                   | 10.6 | 16.7 | 35.6 | 28.1 | 9    | 671  |

**Table S2: Summary statistics by country**

|                |                          | <b>Social Acceptance of Facial Recognition Technology</b> |                        |                                  |                        |                        |
|----------------|--------------------------|-----------------------------------------------------------|------------------------|----------------------------------|------------------------|------------------------|
|                |                          | <i>Strongly oppose</i>                                    | <i>Somewhat oppose</i> | <i>Neither oppose nor accept</i> | <i>Somewhat accept</i> | <i>Strongly accept</i> |
|                |                          | <b>Age Group</b>                                          |                        |                                  |                        |                        |
| <b>China</b>   | <i>18-35</i>             | 0.7                                                       | 6.2                    | 26.0                             | 48.8                   | 18.3                   |
|                | <i>36-50</i>             | 0.6                                                       | 7.4                    | 23.7                             | 50.2                   | 18.2                   |
|                | <i>51-65</i>             | 3.3                                                       | 21.7                   | 18.6                             | 38.1                   | 18.3                   |
| <b>Germany</b> | <i>18-35</i>             | 14.3                                                      | 18.0                   | 34.7                             | 27.1                   | 5.8                    |
|                | <i>36-50</i>             | 16.3                                                      | 17.9                   | 27.5                             | 31.0                   | 7.2                    |
|                | <i>51-65</i>             | 8.6                                                       | 17.3                   | 30.6                             | 33.0                   | 10.5                   |
| <b>UK</b>      | <i>18-35</i>             | 6.5                                                       | 14.8                   | 29.1                             | 35.8                   | 13.8                   |
|                | <i>36-50</i>             | 9.4                                                       | 11.1                   | 27.8                             | 36.1                   | 15.6                   |
|                | <i>51-65</i>             | 10.3                                                      | 15.2                   | 26.0                             | 32.2                   | 16.3                   |
| <b>US</b>      | <i>18-35</i>             | 9.5                                                       | 15.3                   | 30.5                             | 28.4                   | 16.2                   |
|                | <i>36-50</i>             | 7.6                                                       | 18.5                   | 25.6                             | 30.9                   | 17.5                   |
|                | <i>51-65</i>             | 6.8                                                       | 16.1                   | 25.3                             | 37.2                   | 14.6                   |
|                |                          | <b>Gender</b>                                             |                        |                                  |                        |                        |
| <b>China</b>   | <i>Male</i>              | 1.1                                                       | 9.1                    | 23.8                             | 47.5                   | 18.6                   |
|                | <i>Female</i>            | 0.5                                                       | 5.3                    | 26.5                             | 49.9                   | 17.8                   |
| <b>Germany</b> | <i>Male</i>              | 11.5                                                      | 17.8                   | 27.0                             | 34.4                   | 9.4                    |
|                | <i>Female</i>            | 15.6                                                      | 17.8                   | 34.9                             | 25.9                   | 5.8                    |
| <b>UK</b>      | <i>Male</i>              | 9.8                                                       | 13.8                   | 23.9                             | 35.1                   | 17.3                   |
|                | <i>Female</i>            | 7.2                                                       | 13.6                   | 31.7                             | 34.7                   | 12.8                   |
| <b>US</b>      | <i>Male</i>              | 8.5                                                       | 17.7                   | 24.0                             | 31.5                   | 18.3                   |
|                | <i>Female</i>            | 7.8                                                       | 15.5                   | 31.0                             | 31.4                   | 14.2                   |
|                |                          | <b>Education Group</b>                                    |                        |                                  |                        |                        |
| <b>China</b>   | <i>Low</i>               | 2.8                                                       | 7.8                    | 29.0                             | 42.7                   | 17.7                   |
|                | <i>Medium</i>            | 0.4                                                       | 7.4                    | 27.2                             | 48.0                   | 17.0                   |
|                | <i>High</i>              | 1.1                                                       | 7.2                    | 21.1                             | 50.4                   | 20.2                   |
| <b>Germany</b> | <i>Low</i>               | 52.8                                                      | 8.4                    | 16.1                             | 14.2                   | 8.3                    |
|                | <i>Medium</i>            | 5.9                                                       | 18.7                   | 34.8                             | 33.6                   | 7.0                    |
|                | <i>High</i>              | 21.0                                                      | 19.6                   | 23.7                             | 26.2                   | 9.6                    |
| <b>UK</b>      | <i>Low</i>               | 14.9                                                      | 10.5                   | 27.2                             | 34.4                   | 12.1                   |
|                | <i>Medium</i>            | 8.1                                                       | 13.7                   | 29.0                             | 33.9                   | 14.3                   |
|                | <i>High</i>              | 8.5                                                       | 14.4                   | 25.0                             | 37.3                   | 14.7                   |
| <b>US</b>      | <i>Low</i>               | 12.0                                                      | 18.8                   | 24.2                             | 23.8                   | 21.1                   |
|                | <i>Medium</i>            | 8.2                                                       | 17.2                   | 30.1                             | 30.3                   | 14.3                   |
|                | <i>High</i>              | 7.6                                                       | 15.0                   | 21.5                             | 35.3                   | 20.6                   |
|                |                          | <b>Income Group</b>                                       |                        |                                  |                        |                        |
| <b>China</b>   | <i>Low</i>               | 0.8                                                       | 7.7                    | 35.8                             | 40.4                   | 15.3                   |
|                | <i>Medium</i>            | 0.8                                                       | 10.2                   | 25.0                             | 47.1                   | 16.9                   |
|                | <i>High</i>              | 1.0                                                       | 6.1                    | 20.0                             | 52.0                   | 20.9                   |
|                | <i>Prefer not to say</i> | 0.0                                                       | 7.2                    | 35.8                             | 45.5                   | 11.5                   |
| <b>Germany</b> | <i>Low</i>               | 11.3                                                      | 14.3                   | 39.8                             | 27.4                   | 7.3                    |
|                | <i>Medium</i>            | 6.0                                                       | 20.7                   | 33.0                             | 32.1                   | 8.2                    |
|                | <i>High</i>              | 25.5                                                      | 14.4                   | 23.4                             | 28.5                   | 8.2                    |
|                | <i>Prefer not to say</i> | 5.0                                                       | 20.1                   | 40.6                             | 30.4                   | 3.9                    |
| <b>UK</b>      | <i>Low</i>               | 10.5                                                      | 17.6                   | 31.0                             | 28.3                   | 12.7                   |
|                | <i>Medium</i>            | 8.3                                                       | 14.0                   | 24.9                             | 37.6                   | 15.3                   |
|                | <i>High</i>              | 9.3                                                       | 10.7                   | 24.2                             | 35.7                   | 20.1                   |
|                | <i>Prefer not to say</i> |                                                           |                        |                                  |                        |                        |
| <b>US</b>      | <i>Low</i>               | 5.8                                                       | 13.0                   | 42.8                             | 30.0                   | 8.4                    |
|                | <i>Low</i>               | 12.1                                                      | 16.5                   | 31.3                             | 26.0                   | 14.2                   |

|                     |                          |      |      |      |      |      |
|---------------------|--------------------------|------|------|------|------|------|
|                     | <i>Medium</i>            | 7.0  | 17.9 | 27.6 | 29.6 | 17.9 |
|                     | <i>High</i>              | 7.1  | 14.3 | 23.6 | 36.4 | 18.6 |
|                     | <i>Prefer not to say</i> | 9.1  | 20.1 | 32.9 | 28.3 | 9.6  |
| <b>Ethnic Group</b> |                          |      |      |      |      |      |
| <b>China</b>        | <i>Minority</i>          | 1.7  | 6.7  | 31.1 | 39.3 | 21.2 |
|                     | <i>Majority</i>          | 0.7  | 7.5  | 23.9 | 49.8 | 18.2 |
|                     | <i>Don't know</i>        | 1.7  | 6.4  | 33.9 | 42.5 | 15.5 |
| <b>Germany</b>      | <i>Minority</i>          | 10.0 | 23.1 | 29.3 | 27.9 | 9.6  |
|                     | <i>Majority</i>          | 16.9 | 17.2 | 26.6 | 31.5 | 7.8  |
|                     | <i>Don't know</i>        | 5.3  | 16.1 | 45.1 | 27.7 | 5.9  |
| <b>UK</b>           | <i>Minority</i>          | 8.8  | 15.6 | 29.8 | 33.7 | 12.1 |
|                     | <i>Majority</i>          | 8.5  | 13.4 | 24.4 | 37.2 | 16.6 |
|                     | <i>Don't know</i>        | 8.5  | 13.1 | 41.0 | 25.9 | 11.5 |
| <b>US</b>           | <i>Minority</i>          | 8.2  | 17.8 | 27.5 | 27.8 | 18.7 |
|                     | <i>Majority</i>          | 7.0  | 16.7 | 23.8 | 35.5 | 17.1 |
|                     | <i>Don't know</i>        | 11.8 | 15.1 | 39.8 | 22.7 | 10.6 |
| <b>Living area</b>  |                          |      |      |      |      |      |
| <b>China</b>        | <i>Rural</i>             | 1.1  | 7.9  | 26.0 | 47.9 | 17.0 |
|                     | <i>City</i>              | 0.7  | 7.1  | 24.6 | 48.9 | 18.8 |
| <b>Germany</b>      | <i>Rural</i>             | 5.6  | 18.3 | 34.4 | 34.7 | 7.0  |
|                     | <i>City</i>              | 17.4 | 17.5 | 29.1 | 28.0 | 7.9  |
| <b>UK</b>           | <i>Rural</i>             | 9.6  | 13.6 | 29.5 | 33.5 | 13.7 |
|                     | <i>City</i>              | 7.8  | 13.7 | 26.6 | 35.8 | 16.0 |
| <b>US</b>           | <i>Rural</i>             | 7.4  | 14.5 | 32.6 | 31.5 | 14.1 |
|                     | <i>City</i>              | 8.6  | 17.9 | 24.5 | 31.4 | 17.5 |

**Table S3: Model test results**

|         |                 | <b>Linktest</b> |         |       |       |
|---------|-----------------|-----------------|---------|-------|-------|
|         | <i>P&gt; t </i> | China           | Germany | UK    | US    |
| Model 1 | <i>_hat</i>     | 0.060           | 0.000   | 0.001 | 0.017 |
|         | <i>_hatsq</i>   | 0.269           | 0.000   | 0.635 | 0.697 |
| Model 2 | <i>_hat</i>     | 0.000           | 0.000   | 0.000 | 0.000 |
|         | <i>_hatsq</i>   | 0.501           | 0.001   | 0.584 | 0.970 |
|         |                 | <b>Mean vif</b> |         |       |       |
| Model 1 |                 | China           | Germany | UK    | US    |
|         |                 | 4.58            | 3.31    | 3.50  | 3.27  |
| Model 2 |                 | 2.81            | 2.26    | 2.30  | 2.21  |

**Table S4: Ordered logistic regressions: acceptance of general use of FRT**

| Ordered Logit Regression, weighted, dependent variable: social acceptance of FRT (general) |                     |                      |                    |                    |                    |                      |                   |                   |
|--------------------------------------------------------------------------------------------|---------------------|----------------------|--------------------|--------------------|--------------------|----------------------|-------------------|-------------------|
| Model 1                                                                                    |                     |                      |                    |                    | Model 2            |                      |                   |                   |
|                                                                                            | China               | Germany              | UK                 | US                 | China              | Germany              | UK                | US                |
| <b>Age</b>                                                                                 | -0.001<br>(0.005)   | 0.004<br>(0.004)     | 0.006*<br>(0.004)  | 0.009**<br>(0.004) | -0.006<br>(0.006)  | 0.003<br>(0.004)     | 0.002<br>(0.004)  | 0.007*<br>(0.004) |
| <b>Gender</b>                                                                              | 0.214**<br>(0.096)  | -0.421***<br>(0.094) | -0.058<br>(0.098)  | -0.041<br>(0.099)  | 0.215**<br>(0.100) | -0.405***<br>(0.098) | -0.167<br>(0.103) | 0.076<br>(0.102)  |
| <b>Household Income</b>                                                                    |                     |                      |                    |                    |                    |                      |                   |                   |
| Medium                                                                                     | 0.226<br>(0.167)    | -0.078<br>(0.183)    | 0.301**<br>(0.146) | 0.338**<br>(0.160) | 0.164<br>(0.179)   | -0.150<br>(0.190)    | 0.186<br>(0.156)  | 0.170<br>(0.166)  |
| High                                                                                       | 0.474***<br>(0.155) | -0.403**<br>(0.189)  | 0.364**<br>(0.172) | 0.381**<br>(0.157) | 0.387**<br>(0.163) | -0.532***<br>(0.198) | 0.065<br>(0.183)  | 0.153<br>(0.159)  |
| Prefer not to say                                                                          | 0.011<br>(0.179)    | -0.086<br>(0.204)    | 0.054<br>(0.163)   | -0.067<br>(0.175)  | 0.059<br>(0.193)   | 0.097<br>(0.214)     | 0.091<br>(0.179)  | -0.046<br>(0.184) |
| <b>Education</b>                                                                           |                     |                      |                    |                    |                    |                      |                   |                   |
| Medium                                                                                     | -0.166<br>(0.228)   | 1.564***<br>(0.232)  | 0.062<br>(0.211)   | -0.112<br>(0.269)  | -0.271<br>(0.226)  | 1.076***<br>(0.243)  | -0.115<br>(0.233) | -0.198<br>(0.281) |
| High                                                                                       | -0.254<br>(0.239)   | 1.193***<br>(0.260)  | -0.093<br>(0.225)  | 0.003<br>(0.287)   | -0.345<br>(0.239)  | 0.968***<br>(0.265)  | -0.092<br>(0.249) | -0.114<br>(0.296) |
| <b>Ethnic Minority</b>                                                                     | -0.049<br>(0.209)   | -0.010<br>(0.141)    | -0.187<br>(0.131)  | -0.015<br>(0.120)  | -0.015<br>(0.221)  | -0.089<br>(0.149)    | -0.225<br>(0.146) | 0.015<br>(0.121)  |
| <b>City or Rural</b>                                                                       | -0.140<br>(0.113)   | -0.234**<br>(0.095)  | 0.119<br>(0.098)   | 0.017<br>(0.102)   | -0.163<br>(0.119)  | -0.217**<br>(0.099)  | 0.060<br>(0.099)  | 0.045<br>(0.105)  |
| <b>Exposure to FRT</b>                                                                     | 0.003<br>(0.065)    | 0.269***<br>(0.054)  | 0.096<br>(0.059)   | 0.088<br>(0.063)   | -0.003<br>(0.066)  | 0.189***<br>(0.059)  | -0.072<br>(0.065) | -0.028<br>(0.068) |
| <b>Use Frequency</b>                                                                       |                     |                      |                    |                    |                    |                      |                   |                   |
| Private                                                                                    | 0.186***            | 0.062                | 0.035              | 0.178***           | 0.169***           | 0.021                | -0.020            | 0.088**           |

|                               |         |           |         |         |           |           |           |           |
|-------------------------------|---------|-----------|---------|---------|-----------|-----------|-----------|-----------|
|                               | (0.046) | (0.039)   | (0.043) | (0.040) | (0.048)   | (0.042)   | (0.043)   | (0.042)   |
| Public                        | 0.069   | -0.094**  | -0.011  | -0.062  | 0.059     | -0.085**  | -0.034    | -0.038    |
|                               | (0.049) | (0.042)   | (0.042) | (0.041) | (0.050)   | (0.043)   | (0.041)   | (0.042)   |
| <b>exposure # use</b>         | 0.019   | 0.007     | 0.033** | 0.001   | 0.012     | 0.012     | 0.031**   | 0.005     |
| <b>freq. private</b>          | (0.012) | (0.012)   | (0.014) | (0.012) | (0.012)   | (0.012)   | (0.013)   | (0.013)   |
| <b>exposure # use</b>         | -0.017  | -0.045*** | -0.021  | -0.010  | -0.008    | -0.030**  | -0.002    | 0.001     |
| <b>freq. public</b>           | (0.013) | (0.012)   | (0.015) | (0.014) | (0.012)   | (0.013)   | (0.014)   | (0.014)   |
| <b>Perceived consequences</b> |         |           |         |         |           |           |           |           |
| Convenience                   |         |           |         |         | 0.535***  | -0.013    | 0.870***  | 0.411***  |
|                               |         |           |         |         | (0.117)   | (0.131)   | (0.138)   | (0.124)   |
| Privacy violations            |         |           |         |         | -0.548*** | -1.007*** | -0.834*** | -0.718*** |
|                               |         |           |         |         | (0.115)   | (0.110)   | (0.109)   | (0.112)   |
| Efficiency                    |         |           |         |         | 0.337***  | 0.445***  | 0.444***  | 0.680***  |
|                               |         |           |         |         | (0.113)   | (0.139)   | (0.127)   | (0.125)   |
| Discrimination                |         |           |         |         | -0.587*   | -0.812*** | -0.470*** | -0.391*** |
|                               |         |           |         |         | (0.330)   | (0.143)   | (0.144)   | (0.146)   |
| Security                      |         |           |         |         | 0.631***  | 1.101***  | 0.731***  | 0.831***  |
|                               |         |           |         |         | (0.106)   | (0.109)   | (0.120)   | (0.120)   |
| Surveillance                  |         |           |         |         | -0.574*** | 0.256**   | 0.051     | 0.084     |
|                               |         |           |         |         | (0.117)   | (0.114)   | (0.109)   | (0.107)   |
| <b>Perceived usefulness</b>   |         |           |         |         |           |           |           |           |
| Smartphone usages             |         |           |         |         | -0.056    | 0.073     | 0.368***  | 0.509***  |
|                               |         |           |         |         | (0.135)   | (0.126)   | (0.124)   | (0.126)   |
| Smart devices and gadgets     |         |           |         |         | -0.045    | -0.238*   | 0.366***  | 0.380***  |
|                               |         |           |         |         | (0.139)   | (0.135)   | (0.125)   | (0.125)   |
| Public streets                |         |           |         |         | -0.482**  | 0.070     | 0.475***  | 0.543***  |
|                               |         |           |         |         | (0.199)   | (0.132)   | (0.139)   | (0.180)   |
| Railway, subway stations      |         |           |         |         | -0.159    | 0.114     | 0.308**   | 0.261     |
|                               |         |           |         |         | (0.137)   | (0.117)   | (0.130)   | (0.160)   |

|                                               |           |           |           |           |                     |                     |                     |                     |
|-----------------------------------------------|-----------|-----------|-----------|-----------|---------------------|---------------------|---------------------|---------------------|
| Customs control or security check at airports |           |           |           |           | -0.152<br>(0.138)   | 0.751***<br>(0.129) | 0.768***<br>(0.117) | 0.480***<br>(0.120) |
| Tourist attractions                           |           |           |           |           | 0.189<br>(0.231)    | 0.071<br>(0.145)    | 0.574***<br>(0.199) | 0.240<br>(0.185)    |
| Identity verification for financial matters   |           |           |           |           | -0.288**<br>(0.136) | 0.215*<br>(0.120)   | 0.578***<br>(0.117) | 0.660***<br>(0.120) |
| Shopping malls, private shops                 |           |           |           |           | -0.183<br>(0.153)   | 0.190<br>(0.198)    | 0.473***<br>(0.152) | 0.676***<br>(0.205) |
| Schools or universities                       |           |           |           |           | 0.082<br>(0.160)    | 0.510***<br>(0.173) | 0.109<br>(0.122)    | 0.312**<br>(0.134)  |
| Private households                            |           |           |           |           | -0.664**<br>(0.259) | 0.546***<br>(0.203) | 0.119<br>(0.208)    | 0.488***<br>(0.149) |
| <b>Perceived reliability</b>                  |           |           |           |           | 0.768***<br>(0.113) | 0.605***<br>(0.117) | 0.781***<br>(0.123) | 0.992***<br>(0.120) |
| cut1                                          | -3.628*** | -0.961*** | -1.596*** | -1.555*** | -4.047***           | -0.857**            | -1.117***           | -0.417              |
| Constant                                      | (0.476)   | (0.333)   | (0.334)   | (0.380)   | (0.569)             | (0.391)             | (0.384)             | (0.432)             |
| cut2                                          | -1.219*** | 0.273     | -0.467    | -0.219    | -1.510***           | 0.686*              | 0.251               | 1.194***            |
| Constant                                      | (0.372)   | (0.336)   | (0.328)   | (0.367)   | (0.475)             | (0.387)             | (0.383)             | (0.426)             |
| cut3                                          | 0.588     | 1.674***  | 0.830**   | 1.036***  | 0.528               | 2.487***            | 1.896***            | 2.771***            |
| Constant                                      | (0.375)   | (0.339)   | (0.329)   | (0.368)   | (0.478)             | (0.391)             | (0.384)             | (0.428)             |
| cut4                                          | 2.951***  | 3.766***  | 2.644***  | 2.671***  | 3.217***            | 4.909***            | 4.099***            | 4.744***            |
| Constant                                      | (0.383)   | (0.355)   | (0.338)   | (0.378)   | (0.489)             | (0.411)             | (0.396)             | (0.439)             |

Standard errors in parentheses

\*  $p < .10$ , \*\*  $p < .05$ , \*\*\*  $p < .01$

Note: Dependent variable: social acceptance of FRT (1 = strongly oppose, 2 = somewhat oppose, 3 = neither oppose nor support, 4 = somewhat support, 5 = strongly support). N for Total = 6099, China = 1628, Germany = 1538, UK = 1524, US = 1409.



**Table S5: Ordered logistic regressions: acceptance of public use of FRT**

|                                     |                   | <b>Model 1 Acceptance of FRT (Public)</b> |                     |                    |                     | <b>Model 2 Acceptance (Public)</b> |                     |                     |                     |
|-------------------------------------|-------------------|-------------------------------------------|---------------------|--------------------|---------------------|------------------------------------|---------------------|---------------------|---------------------|
|                                     |                   | <b>China</b>                              | <b>Germany</b>      | <b>UK</b>          | <b>US</b>           | <b>China</b>                       | <b>Germany</b>      | <b>UK</b>           | <b>US</b>           |
| <b><u>acceptance frt public</u></b> |                   |                                           |                     |                    |                     |                                    |                     |                     |                     |
| <b>Age</b>                          |                   | 0.007<br>(0.005)                          | 0.009**<br>(0.004)  | 0.009**<br>(0.004) | 0.016***<br>(0.004) | 0.003<br>(0.005)                   | 0.002<br>(0.004)    | 0.003<br>(0.004)    | 0.012***<br>(0.004) |
| <b>Gender</b>                       |                   | 0.207**<br>(0.093)                        | -0.206**<br>(0.092) | 0.058<br>(0.097)   | -0.006<br>(0.099)   | 0.201**<br>(0.096)                 | -0.212**<br>(0.096) | -0.020<br>(0.100)   | 0.116<br>(0.101)    |
|                                     | Female            |                                           |                     |                    |                     |                                    |                     |                     |                     |
| <b>Ethnic Minority</b>              |                   | 0.232<br>(0.177)                          | 0.001<br>(0.148)    | -0.118<br>(0.138)  | 0.003<br>(0.122)    | 0.301<br>(0.188)                   | -0.017<br>(0.152)   | -0.176<br>(0.150)   | 0.062<br>(0.125)    |
|                                     | Yes               |                                           |                     |                    |                     |                                    |                     |                     |                     |
| <b>Education</b>                    |                   |                                           |                     |                    |                     |                                    |                     |                     |                     |
|                                     | Medium            | 0.036<br>(0.226)                          | 1.141***<br>(0.208) | -0.047<br>(0.190)  | -0.132<br>(0.271)   | -0.079<br>(0.250)                  | 0.710***<br>(0.219) | -0.213<br>(0.222)   | -0.144<br>(0.293)   |
|                                     | High              | 0.073<br>(0.235)                          | 0.915***<br>(0.237) | -0.029<br>(0.205)  | 0.108<br>(0.288)    | -0.059<br>(0.261)                  | 0.703***<br>(0.247) | 0.073<br>(0.237)    | 0.023<br>(0.307)    |
| <b>Household Income</b>             |                   |                                           |                     |                    |                     |                                    |                     |                     |                     |
|                                     | Medium            | 0.156<br>(0.160)                          | 0.173<br>(0.179)    | 0.328**<br>(0.143) | 0.187<br>(0.153)    | 0.094<br>(0.168)                   | 0.182<br>(0.183)    | 0.208<br>(0.157)    | 0.084<br>(0.156)    |
|                                     | High              | 0.338**<br>(0.152)                        | -0.195<br>(0.184)   | 0.223<br>(0.171)   | 0.138<br>(0.146)    | 0.203<br>(0.160)                   | -0.195<br>(0.191)   | 0.005<br>(0.182)    | -0.070<br>(0.150)   |
|                                     | Prefer not to say | 0.014<br>(0.168)                          | -0.056<br>(0.204)   | 0.117<br>(0.161)   | -0.184<br>(0.170)   | -0.021<br>(0.185)                  | 0.199<br>(0.213)    | 0.122<br>(0.185)    | -0.133<br>(0.185)   |
| <b>City or Rural</b>                |                   | -0.003<br>(0.109)                         | -0.180*<br>(0.098)  | 0.013<br>(0.099)   | -0.039<br>(0.104)   | -0.030<br>(0.112)                  | -0.162<br>(0.101)   | -0.063<br>(0.100)   | -0.011<br>(0.106)   |
|                                     | City              |                                           |                     |                    |                     |                                    |                     |                     |                     |
| <b>Exposure to FRT</b>              |                   | -0.012<br>(0.059)                         | 0.292***<br>(0.056) | 0.041<br>(0.066)   | 0.028<br>(0.051)    | -0.001<br>(0.062)                  | 0.219***<br>(0.061) | -0.094<br>(0.069)   | -0.068<br>(0.053)   |
| <b>Use Frequency</b>                |                   |                                           |                     |                    |                     |                                    |                     |                     |                     |
|                                     | private           | 0.013<br>(0.041)                          | -0.081*<br>(0.043)  | -0.037<br>(0.041)  | 0.079**<br>(0.039)  | 0.020<br>(0.045)                   | -0.112**<br>(0.047) | -0.088**<br>(0.042) | -0.003<br>(0.041)   |
|                                     | public            | 0.098**<br>(0.044)                        | 0.042<br>(0.045)    | 0.012<br>(0.042)   | -0.036<br>(0.041)   | 0.090*<br>(0.047)                  | 0.039<br>(0.048)    | -0.018<br>(0.041)   | -0.017<br>(0.041)   |

|                                                  |         |           |         |         |           |           |           |           |
|--------------------------------------------------|---------|-----------|---------|---------|-----------|-----------|-----------|-----------|
| <b>exposure # use</b>                            | 0.013   | 0.026*    | 0.036** | 0.009   | 0.001     | 0.030**   | 0.034**   | 0.009     |
| <b>freq. private</b>                             | (0.011) | (0.013)   | (0.014) | (0.011) | (0.011)   | (0.014)   | (0.014)   | (0.012)   |
| <b>exposure # use</b>                            | -0.007  | -0.063*** | -0.015  | 0.000   | -0.001    | -0.049*** | -0.000    | 0.012     |
| <b>freq. public</b>                              | (0.011) | (0.013)   | (0.017) | (0.011) | (0.011)   | (0.015)   | (0.016)   | (0.012)   |
| <b>Perceived consequences</b>                    |         |           |         |         |           |           |           |           |
| Convenience                                      |         |           |         |         | 0.683***  | -0.150    | 0.653***  | 0.539***  |
|                                                  |         |           |         |         | (0.111)   | (0.132)   | (0.140)   | (0.122)   |
| Privacy violations                               |         |           |         |         | -0.548*** | -1.007*** | -1.060*** | -0.901*** |
|                                                  |         |           |         |         | (0.117)   | (0.109)   | (0.113)   | (0.115)   |
| Efficiency                                       |         |           |         |         | 0.137     | 0.368***  | 0.624***  | 0.490***  |
|                                                  |         |           |         |         | (0.108)   | (0.135)   | (0.131)   | (0.123)   |
| Discrimination                                   |         |           |         |         | -0.494*   | -0.752*** | -0.491*** | -0.434*** |
|                                                  |         |           |         |         | (0.295)   | (0.145)   | (0.142)   | (0.155)   |
| Security                                         |         |           |         |         | 0.742***  | 1.046***  | 0.581***  | 0.663***  |
|                                                  |         |           |         |         | (0.102)   | (0.107)   | (0.117)   | (0.118)   |
| Surveillance                                     |         |           |         |         | -0.428*** | 0.171     | 0.004     | -0.025    |
|                                                  |         |           |         |         | (0.114)   | (0.110)   | (0.106)   | (0.105)   |
| <b>Perceived usefulness</b>                      |         |           |         |         |           |           |           |           |
| Smartphone usages                                |         |           |         |         | -0.396*** | -0.079    | 0.132     | 0.216*    |
|                                                  |         |           |         |         | (0.133)   | (0.133)   | (0.126)   | (0.123)   |
| Smart devices and<br>gadgets                     |         |           |         |         | -0.103    | -0.181    | 0.192     | 0.184     |
|                                                  |         |           |         |         | (0.137)   | (0.135)   | (0.126)   | (0.124)   |
| Public streets                                   |         |           |         |         | 0.461**   | 0.516***  | 0.781***  | 0.836***  |
|                                                  |         |           |         |         | (0.207)   | (0.135)   | (0.135)   | (0.178)   |
| Railway, subway<br>stations                      |         |           |         |         | 0.024     | 0.490***  | 0.455***  | 0.362**   |
|                                                  |         |           |         |         | (0.134)   | (0.119)   | (0.133)   | (0.148)   |
| Customs control or<br>security check at airports |         |           |         |         | -0.075    | 0.589***  | 0.678***  | 0.395***  |
|                                                  |         |           |         |         | (0.134)   | (0.132)   | (0.119)   | (0.119)   |
| Tourist attractions                              |         |           |         |         | 0.122     | 0.170     | 0.595***  | 0.424**   |

|                                             |           |          |           |          |           |          |          |          |
|---------------------------------------------|-----------|----------|-----------|----------|-----------|----------|----------|----------|
| Identity verification for financial matters |           |          |           |          | (0.246)   | (0.146)  | (0.177)  | (0.193)  |
|                                             |           |          |           |          | -0.501*** | 0.106    | 0.355*** | 0.401*** |
| Shopping malls, private shops               |           |          |           |          | (0.134)   | (0.125)  | (0.115)  | (0.118)  |
|                                             |           |          |           |          | 0.009     | 0.543*** | 0.638*** | 0.689*** |
| Schools of universities                     |           |          |           |          | (0.151)   | (0.193)  | (0.153)  | (0.195)  |
|                                             |           |          |           |          | -0.044    | 0.642*** | 0.175    | 0.290**  |
| Private households                          |           |          |           |          | (0.161)   | (0.171)  | (0.120)  | (0.127)  |
|                                             |           |          |           |          | -0.050    | 0.306    | -0.153   | 0.328**  |
| <b>Perceived reliability</b>                |           |          |           |          | (0.233)   | (0.215)  | (0.205)  | (0.154)  |
|                                             |           |          |           |          | 0.577***  | 0.457*** | 0.713*** | 0.939*** |
|                                             |           |          |           |          | (0.104)   | (0.115)  | (0.120)  | (0.118)  |
| cut1                                        | -2.138*** | -0.342   | -1.076*** | -0.905** | -2.398*** | -0.280   | -0.959** | -0.112   |
| Constant                                    | (0.361)   | (0.324)  | (0.305)   | (0.374)  | (0.466)   | (0.396)  | (0.378)  | (0.440)  |
| cut2                                        | -0.170    | 0.849*** | 0.044     | 0.326    | -0.269    | 1.227*** | 0.449    | 1.372*** |
| Constant                                    | (0.341)   | (0.329)  | (0.304)   | (0.369)  | (0.444)   | (0.399)  | (0.381)  | (0.437)  |
| cut3                                        | 1.105***  | 1.858*** | 1.095***  | 1.413*** | 1.192***  | 2.546*** | 1.817*** | 2.727*** |
| Constant                                    | (0.341)   | (0.332)  | (0.306)   | (0.371)  | (0.444)   | (0.404)  | (0.383)  | (0.437)  |
| cut4                                        | 3.214***  | 3.843*** | 2.821***  | 2.926*** | 3.551***  | 4.880*** | 3.929*** | 4.515*** |
| Constant                                    | (0.350)   | (0.347)  | (0.315)   | (0.381)  | (0.454)   | (0.422)  | (0.396)  | (0.450)  |

Standard errors in parentheses  
\*  $p < 0.10$ , \*\*  $p < 0.05$ , \*\*\*  $p < 0.01$

**Table S6: Ordered logistic regressions: acceptance of private use of FRT**

|                                      | Model 1 Acceptance of FRT (Private) |                      |                     |                     | Model 2 Acceptance of FRT (Private) |                      |                   |                     |
|--------------------------------------|-------------------------------------|----------------------|---------------------|---------------------|-------------------------------------|----------------------|-------------------|---------------------|
|                                      | China                               | Germany              | UK                  | US                  | China                               | Germany              | UK                | US                  |
| <b><u>acceptance frt private</u></b> |                                     |                      |                     |                     |                                     |                      |                   |                     |
| <b>Age</b>                           | 0.007<br>(0.005)                    | -0.012***<br>(0.004) | -0.007*<br>(0.004)  | -0.004<br>(0.004)   | 0.005<br>(0.006)                    | -0.008**<br>(0.004)  | 0.002<br>(0.004)  | -0.002<br>(0.005)   |
| <b>Gender</b>                        | 0.028<br>(0.096)                    | -0.574***<br>(0.094) | -0.106<br>(0.097)   | -0.097<br>(0.099)   | 0.052<br>(0.100)                    | -0.452***<br>(0.097) | -0.167<br>(0.103) | -0.073<br>(0.103)   |
| <b>Ethnic Minority</b>               | -0.029<br>(0.200)                   | 0.095<br>(0.136)     | -0.272**<br>(0.135) | -0.037<br>(0.120)   | 0.006<br>(0.220)                    | 0.025<br>(0.139)     | -0.225<br>(0.146) | 0.075<br>(0.127)    |
| <b>Education</b>                     |                                     |                      |                     |                     |                                     |                      |                   |                     |
| Medium                               | -0.013<br>(0.234)                   | 1.338***<br>(0.218)  | 0.125<br>(0.201)    | 0.033<br>(0.241)    | -0.048<br>(0.242)                   | 1.091***<br>(0.227)  | -0.115<br>(0.233) | -0.029<br>(0.249)   |
| High                                 | -0.134<br>(0.250)                   | 0.924***<br>(0.254)  | -0.126<br>(0.215)   | 0.012<br>(0.258)    | -0.074<br>(0.257)                   | 0.917***<br>(0.263)  | -0.092<br>(0.249) | -0.057<br>(0.267)   |
| <b>Household Income</b>              |                                     |                      |                     |                     |                                     |                      |                   |                     |
| Medium                               | 0.347**<br>(0.168)                  | -0.430**<br>(0.187)  | 0.354**<br>(0.142)  | 0.460***<br>(0.154) | 0.340*<br>(0.174)                   | -0.473**<br>(0.191)  | 0.186<br>(0.156)  | 0.281*<br>(0.161)   |
| High                                 | 0.522***<br>(0.153)                 | -0.483**<br>(0.193)  | 0.566***<br>(0.167) | 0.700***<br>(0.150) | 0.480***<br>(0.159)                 | -0.628***<br>(0.196) | 0.065<br>(0.183)  | 0.526***<br>(0.156) |
| Prefer not to say                    | 0.255<br>(0.191)                    | -0.147<br>(0.212)    | 0.120<br>(0.170)    | 0.031<br>(0.168)    | 0.249<br>(0.199)                    | -0.051<br>(0.217)    | 0.091<br>(0.179)  | -0.078<br>(0.174)   |
| <b>City or Rural</b>                 |                                     |                      |                     |                     |                                     |                      |                   |                     |
| City                                 | -0.063<br>(0.117)                   | -0.047<br>(0.097)    | 0.072<br>(0.097)    | -0.000<br>(0.104)   | -0.049<br>(0.120)                   | -0.065<br>(0.100)    | 0.060<br>(0.099)  | 0.090<br>(0.107)    |
| <b>Exposure to FRT</b>               | -0.039<br>(0.067)                   | 0.141**<br>(0.058)   | 0.165**<br>(0.066)  | 0.113*<br>(0.059)   | -0.005<br>(0.069)                   | 0.063<br>(0.060)     | -0.072<br>(0.065) | 0.008<br>(0.059)    |
| <b>Use Frequency</b>                 |                                     |                      |                     |                     |                                     |                      |                   |                     |
| private                              | 0.253***<br>(0.048)                 | 0.185***<br>(0.045)  | 0.174***<br>(0.043) | 0.270***<br>(0.040) | 0.236***<br>(0.050)                 | 0.097**<br>(0.048)   | -0.020<br>(0.043) | 0.157***<br>(0.040) |
| public                               | 0.016<br>(0.049)                    | -0.194***<br>(0.043) | -0.044<br>(0.041)   | -0.088**<br>(0.041) | 0.020<br>(0.052)                    | -0.163***<br>(0.047) | -0.034<br>(0.041) | -0.053<br>(0.041)   |

|                                                  |         |         |         |         |           |           |           |           |
|--------------------------------------------------|---------|---------|---------|---------|-----------|-----------|-----------|-----------|
| <b>exposure # use</b>                            | 0.026** | 0.017   | 0.022   | -0.010  | 0.016     | 0.026*    | 0.031**   | -0.006    |
| <b>freq. private</b>                             | (0.013) | (0.013) | (0.014) | (0.012) | (0.013)   | (0.013)   | (0.013)   | (0.011)   |
| <b>exposure # use</b>                            | -0.013  | -0.022* | -0.020  | -0.006  | -0.006    | -0.008    | -0.002    | 0.010     |
| <b>freq. public</b>                              | (0.013) | (0.012) | (0.015) | (0.013) | (0.013)   | (0.013)   | (0.014)   | (0.013)   |
| <b>Perceived consequences</b>                    |         |         |         |         |           |           |           |           |
| Convenience                                      |         |         |         |         | 0.594***  | -0.050    | 0.870***  | 0.546***  |
|                                                  |         |         |         |         | (0.115)   | (0.127)   | (0.138)   | (0.129)   |
| Privacy violations                               |         |         |         |         | -0.567*** | -0.911*** | -0.834*** | -0.530*** |
|                                                  |         |         |         |         | (0.111)   | (0.105)   | (0.109)   | (0.114)   |
| Efficiency                                       |         |         |         |         | 0.043     | 0.430***  | 0.444***  | 0.403***  |
|                                                  |         |         |         |         | (0.111)   | (0.131)   | (0.127)   | (0.130)   |
| Discrimination                                   |         |         |         |         | -0.514    | -0.869*** | -0.470*** | -0.414*** |
|                                                  |         |         |         |         | (0.366)   | (0.160)   | (0.144)   | (0.150)   |
| Security                                         |         |         |         |         | 0.544***  | 0.684***  | 0.731***  | 0.535***  |
|                                                  |         |         |         |         | (0.108)   | (0.106)   | (0.120)   | (0.122)   |
| Surveillance                                     |         |         |         |         | -0.432*** | 0.249**   | 0.051     | -0.031    |
|                                                  |         |         |         |         | (0.113)   | (0.109)   | (0.109)   | (0.110)   |
| <b>Perceived usefulness</b>                      |         |         |         |         |           |           |           |           |
| Smartphone usages                                |         |         |         |         | 0.233*    | 0.777***  | 0.368***  | 1.017***  |
|                                                  |         |         |         |         | (0.125)   | (0.129)   | (0.124)   | (0.127)   |
| Smart devices and<br>gadgets                     |         |         |         |         | -0.002    | -0.160    | 0.366***  | 0.825***  |
|                                                  |         |         |         |         | (0.130)   | (0.133)   | (0.125)   | (0.127)   |
| Public streets                                   |         |         |         |         | -0.339    | -0.105    | 0.475***  | 0.013     |
|                                                  |         |         |         |         | (0.216)   | (0.136)   | (0.139)   | (0.172)   |
| Railway, subway<br>stations                      |         |         |         |         | -0.354*** | -0.166    | 0.308**   | -0.133    |
|                                                  |         |         |         |         | (0.130)   | (0.122)   | (0.130)   | (0.151)   |
| Customs control or<br>security check at airports |         |         |         |         | -0.130    | 0.315**   | 0.768***  | 0.460***  |
|                                                  |         |         |         |         | (0.133)   | (0.133)   | (0.117)   | (0.121)   |
| Tourist attractions                              |         |         |         |         | -0.336    | -0.345**  | 0.574***  | 0.063     |

|                                             |           |           |           |           |           |           |           |          |
|---------------------------------------------|-----------|-----------|-----------|-----------|-----------|-----------|-----------|----------|
| Identity verification for financial matters |           |           |           |           | (0.249)   | (0.143)   | (0.199)   | (0.164)  |
|                                             |           |           |           |           | -0.458*** | 0.337***  | 0.578***  | 0.364*** |
| Shopping malls, private shops               |           |           |           |           | (0.129)   | (0.117)   | (0.117)   | (0.117)  |
|                                             |           |           |           |           | -0.277*   | -0.117    | 0.473***  | -0.088   |
| Schools of universities                     |           |           |           |           | (0.150)   | (0.193)   | (0.152)   | (0.189)  |
|                                             |           |           |           |           | -0.175    | 0.174     | 0.109     | 0.276**  |
| Private households                          |           |           |           |           | (0.163)   | (0.165)   | (0.122)   | (0.124)  |
|                                             |           |           |           |           | -0.230    | 0.725***  | 0.119     | 0.540*** |
| <b>Perceived reliability</b>                |           |           |           |           | (0.299)   | (0.210)   | (0.208)   | (0.152)  |
|                                             |           |           |           |           | 0.643***  | 0.466***  | 0.781***  | 0.786*** |
|                                             |           |           |           |           | (0.110)   | (0.111)   | (0.123)   | (0.118)  |
| cut1                                        | -3.313*** | -1.526*** | -1.614*** | -1.417*** | -3.513*** | -1.355*** | -1.117*** | -0.306   |
| Constant                                    | (0.489)   | (0.325)   | (0.314)   | (0.356)   | (0.557)   | (0.376)   | (0.384)   | (0.406)  |
| cut2                                        | -0.630*   | -0.621*   | -0.703**  | -0.507    | -0.727    | -0.285    | 0.251     | 0.771*   |
| Constant                                    | (0.364)   | (0.325)   | (0.312)   | (0.350)   | (0.448)   | (0.374)   | (0.383)   | (0.402)  |
| cut3                                        | 0.950***  | 0.866***  | 0.652**   | 0.740**   | 1.005**   | 1.530***  | 1.896***  | 2.308*** |
| Constant                                    | (0.364)   | (0.325)   | (0.313)   | (0.353)   | (0.449)   | (0.377)   | (0.384)   | (0.409)  |
| cut4                                        | 3.298***  | 2.462***  | 2.265***  | 2.289***  | 3.626***  | 3.367***  | 4.099***  | 4.167*** |
| Constant                                    | (0.372)   | (0.332)   | (0.324)   | (0.361)   | (0.459)   | (0.389)   | (0.396)   | (0.421)  |

Standard errors in parentheses

\*  $p < 0.10$ , \*\*  $p < 0.05$ , \*\*\*  $p < 0.01$

**Figure S1 Social acceptance and socio-demographic factors (total sample, weighted, in%)**

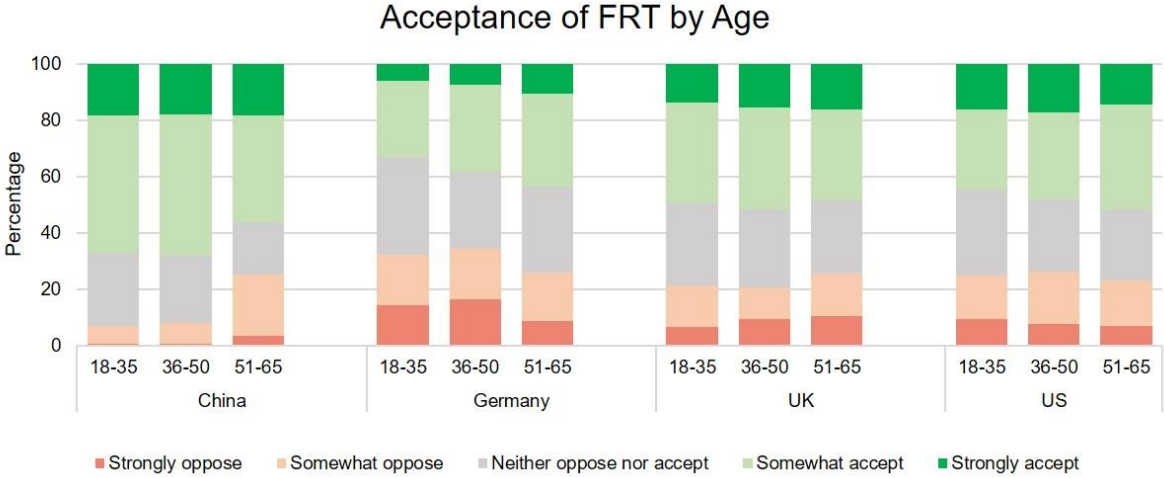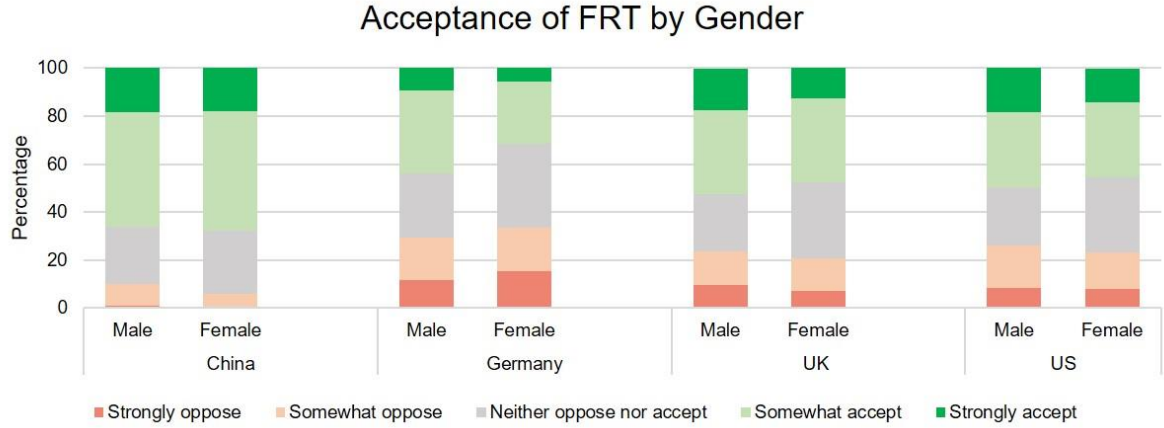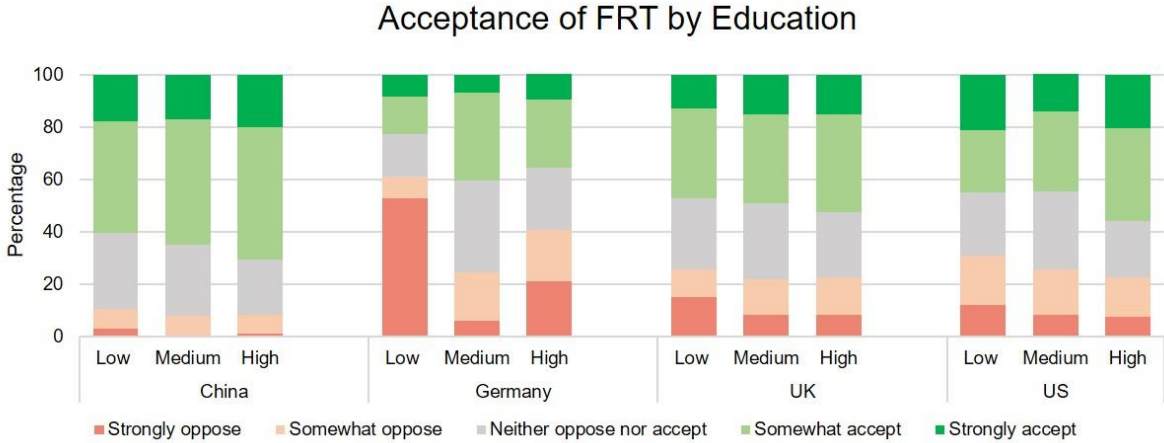

### Acceptance of FRT by Income

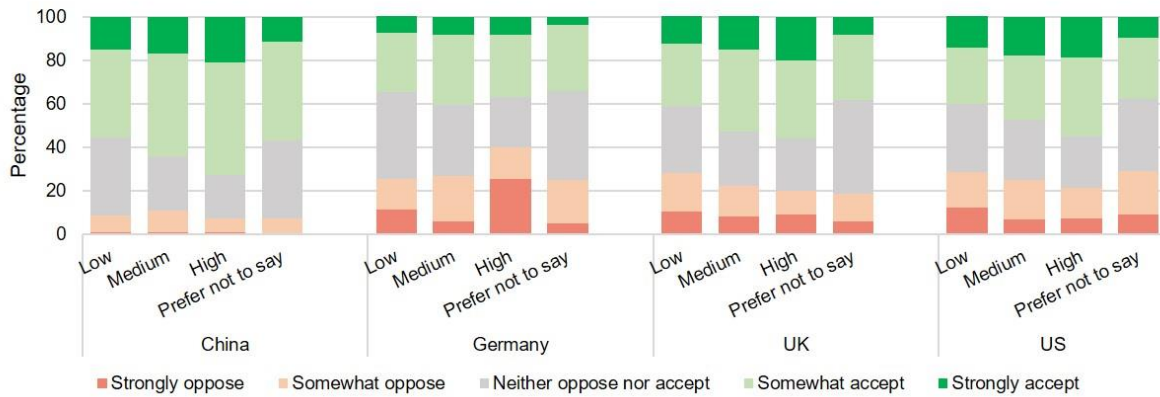

### Acceptance of FRT by Ethnicity

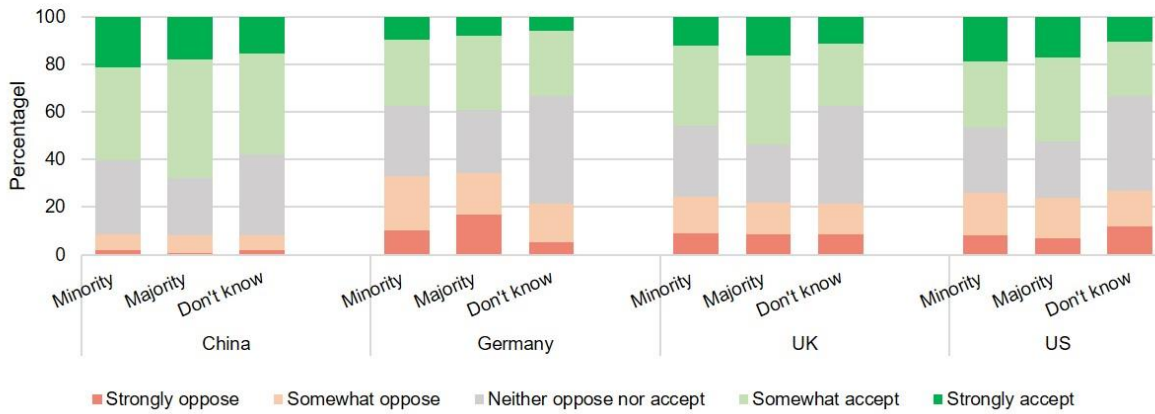

### Acceptance of FRT by City/Rural

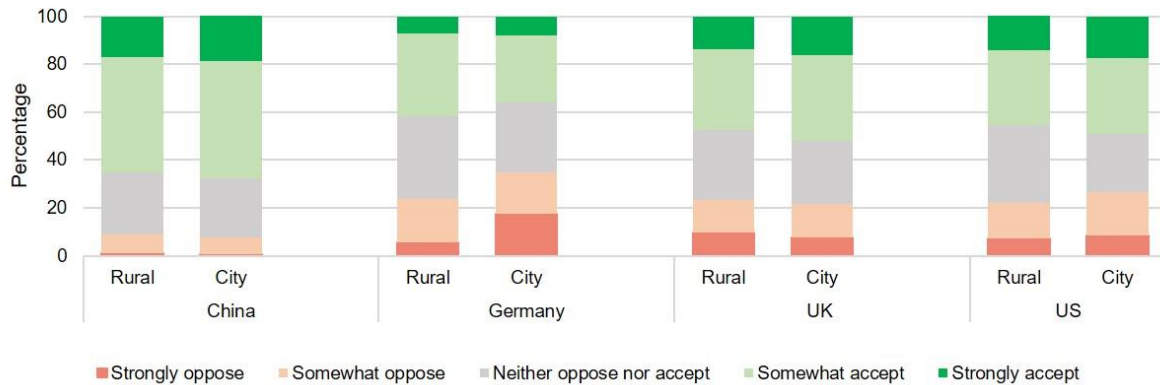

Note: N= 6.099; education was grouped as follows: low (no formal education); medium (high school diploma or equivalent & vocational training); and high (bachelor's degree & master's or doctorate's degree). Income was grouped as follows: For GER, UK, US: low (under 250-1.000), medium (1.000-4.000), High (above 4.000); prefer not to say; For China: low (under 700-2.100), medium (2.100-5.200), high (above 5.200), prefer not to say; in local currency.



**Table 2: Use occasions by country** (On which of the following occasions have you seen facial recognition technology being used? Respondents answering with yes in %, weighted)

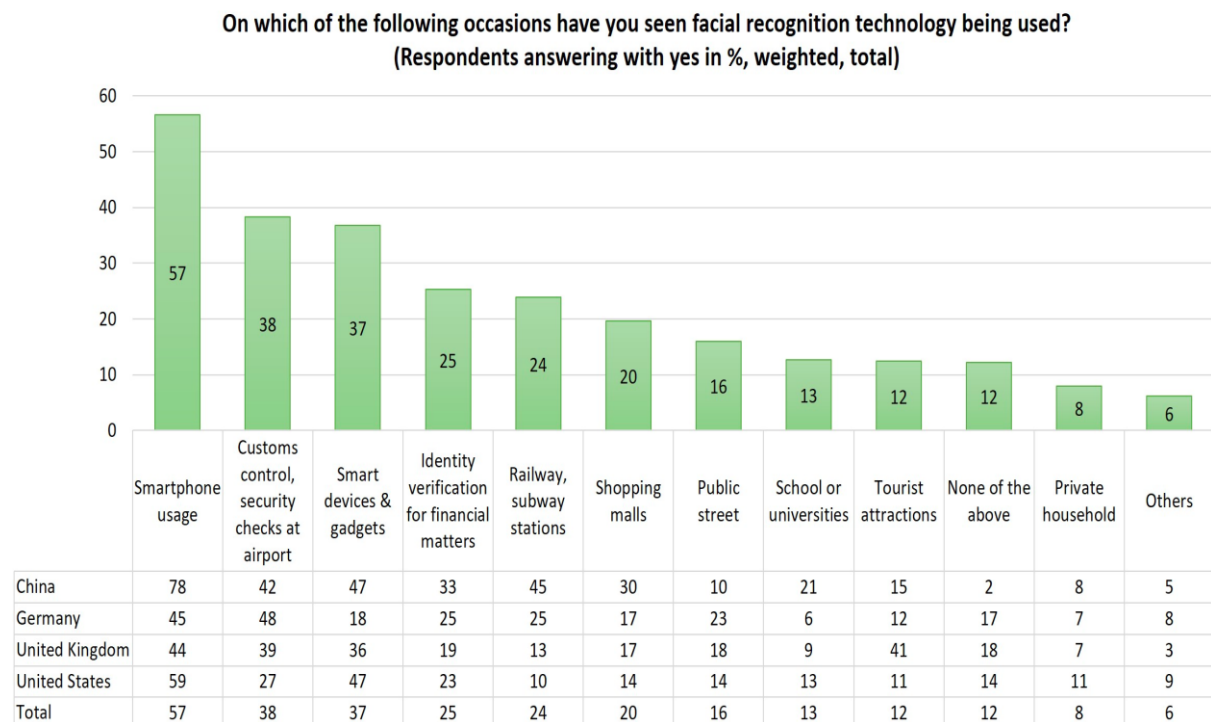

**Figure S3: FRT Providers - country distribution**

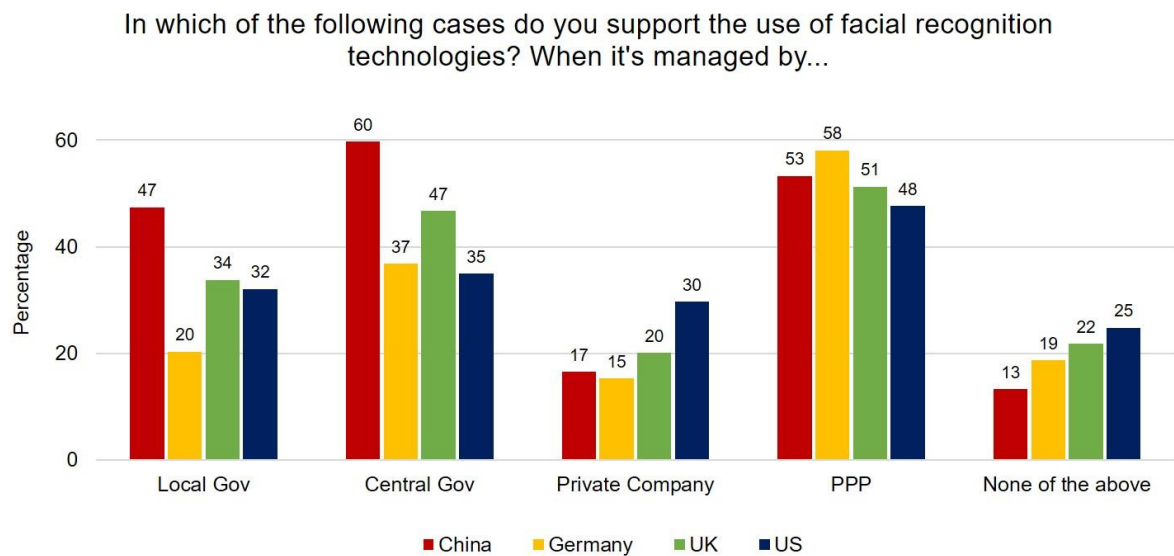

**Figure S4: Experience – Private Use**

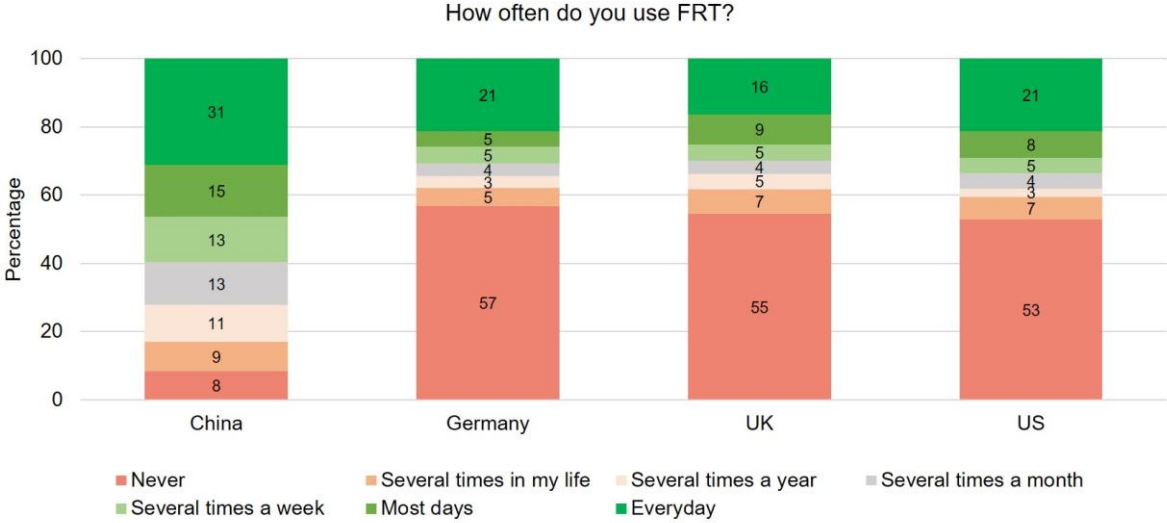

Supplement: sj-pdf-1-pus-10.1177_09636625211001555.pdf [file sj-pdf-1-pus-10.1177_09636625211001555.pdf]
